# Supplementary material for: More severe parotid gland histopathology in paediatric-onset than in adult-onset Sjögren’s disease
Source: PubMed Central journal article supplement — RMD Open. 2024 Aug 13;10(3):e004201. doi: 10.1136/rmdopen-2024-004201 (PMC11332018; doi:10.1136/rmdopen-2024-004201), 2024-08-13
Supplement: rmdopen-10-3-s001.pdf [file rmdopen-10-3-s001.pdf]

## Supplementary Tables

**Supplementary Table 1. Parotid gland biopsy results in a subpopulation of patients with major salivary gland enlargement**

|                                    | pedSjD<br>n=18     | diagnostic<br>adSjD<br>n=12 | pedSjD<br>vs<br>diagnosti<br>c adSjD<br>p-value | trial adSjD<br>n=33 | pedSjD<br>vs. trial<br>adSjD<br>p-value |
|------------------------------------|--------------------|-----------------------------|-------------------------------------------------|---------------------|-----------------------------------------|
| Focus score*                       | 2.7 (1.75-3.55)    | 1.1 (1.0-1.78)^             | <b>0.010</b>                                    | 1.84 (1.32-4.72)    | 0.72                                    |
| CD45+ cells *<br>(% of parenchyma) | 20.65 (9.82-36.33) | 15.22 (3.76-25.41)          | 0.19                                            | 19.84 (6.97-32.94)  | 0.622                                   |
| LELs/mm2*                          | 0.05 (0.00-0.31)   | 0.16 (0.0125-0.26)          | 0.73                                            | 0.14 (0.00-0.49)    | 0.52                                    |
| Presence of LELs, n(%)             | 9 (50)             | 9 (75)                      | 0.26                                            | 21 (66)             | 0.28                                    |
| LEL severity (1-3)*                | 2 (1-3)            | 2 (1-2.5)                   | 0.78                                            | 1 (1-2.5)           | 0.38                                    |
| CD21+ FDC-<br>networks/mm2 *       | 0.21 (0.09-0.86)^  | 0.00 (0.10-0.38)            | 0.14                                            | 0.26 (0.00-0.49)    | 0.41                                    |
| Bcl6+ Ectopic GC/mm2*              | 0.15 (0.08-0.34)   | 0.00 (0.00-0.13)            | <b>0.024</b>                                    | 0.00 (0.00-0.32)    | 0.098                                   |
| CD3+ cells/mm2*                    | 1444 (977-2058)    | 470 (177-1406)              | 0.090                                           | 718 (258-1960)      | 0.168                                   |
| CD20+ cells/mm2*                   | 1735(592-2818)     | 488 (98-877)                | <b>0.014</b>                                    | 651 (136-1510)      | <b>0.020</b>                            |
| CD20/(CD20+CD3)ratio*              | 0.52 (0.36-0.59)   | 0.39 (0.27-0.50)            | <b>0.042</b>                                    | 0.40 (0.24-0.48)    | <b>0.011</b>                            |
| CD3/CD20 segregation,<br>n(%)      | 14 (79)            | 9 (75)                      | 0.60                                            | 19 (58)             | 0.22                                    |
| IgA/IgG plasma cell shift,<br>n(%) | 9 (50)             | 7 (58)                      | 0.47                                            | 17 (52)             | 0.92                                    |
| IgM+ plasma cells/mm2*             | 70 (32.5-168)      | 24.1 (12.5-51.7-93)         | <b>0.018</b>                                    | 18.4(4.3-80.4)      | <b>0.002</b>                            |

Data is reported as median (IQR)\* or n(%).

Abbreviations: LEL: lymphoepithelial lesion, mm2: square millimeter, IQR: interquartile range, FDC: follicular dendritic cell, GC: germinal center

Significant p-values are italicized and bold

Missing data: ^0-5, \$6-10, \*11-15, #16-20

**Supplementary Tabel 2. Parotid gland biopsy results in a subpopulation of anti-SSA positive patients**

|                                    | pedSjD<br>n=13    | diagnostic<br>adSjD<br>n=31 | pedSjD vs<br>diagnostic<br>adSjD<br>p-value | trial adSjD<br>n=36 | pedSjD<br>vs. trial<br>adSjD<br>p-value |
|------------------------------------|-------------------|-----------------------------|---------------------------------------------|---------------------|-----------------------------------------|
| Focus score*                       | 2.8 (1.95-3.7)    | 1.1 (0.3-1.8)^              | <b>0.002</b>                                | 2.42 (1.29-5.22)    | 0.89                                    |
| CD45+ cells*<br>(% of parenchyma)  | 28.5 (16.4-40.4-) | 10.80 (3.36-24.44)          | <b>0.006</b>                                | 20.05 (8.57-34.82)  | 0.28                                    |
| LELs/mm2*                          | 0.25 (0.00-0.47)  | 0.14 (0.00-0.26)            | 0.31                                        | 0.14 (0.00-0.46)    | 0.70^                                   |
| Presence of LELs, n(%)             | 8 (62)            | 18 (58)                     | 1.00                                        | 23 (64)             | 0.88                                    |
| LEL severity (1-3)*                | 2^ (1-3)          | 2 (1-3)                     | 0.89                                        | 1* (1-2)            | 0.32                                    |
| CD21+ FDC-<br>networks/mm2*        | 0.43 (0.09-1.1)^  | 0.00 (0.00-0.36)            | <b>0.009</b>                                | 0.27 (0.00-0.49)    | 0.16                                    |
| Bcl6+ Ectopic GC/mm2*              | 0.2 (0.09-0.37)   | 0.00 (0.00-0.13)            | <b>&lt;0.001</b>                            | 0.00 (0.00-0.30)    | <b>0.032</b>                            |
| CD3+ cells/mm2*                    | 1738 (1031-2648)  | 474 (170-1450)              | <b>0.015</b>                                | 962 (438-1962)      | 0.21                                    |
| CD20+ cells/mm2*                   | 2793(1423-3156)   | 381 (66.5-1039)             | <b>&lt;0.001</b>                            | 700 (292-1591)      | <b>0.007</b>                            |
| CD20/(CD20+CD3)ratio*              | 0.58 (0.51-0.60)  | 0.41 (0.26-0.48)            | <b>0.013</b>                                | 0.41 (0.237-0.52)   | <b>0.004</b>                            |
| CD3/CD20 segregation,<br>n(%)      | 10 (77)           | 17 (55)                     | 0.20                                        | 24 (67)             | 0.73                                    |
| IgA/IgG plasma cell shift,<br>n(%) | 8 (62)            | 18 (58)                     | 0.83                                        | 24 (67)             | 0.75                                    |
| IgM+ plasma cells/mm2*             | 71(30-180)        | 44 (10-94)                  | 0.083                                       | 33^ (3.7-94)        | <b>0.021</b>                            |

Data is reported as median (IQR)\* or n(%).

Abbreviations: LEL: lymphoepithelial lesion,, Mm2: square millimeter, IQR: interquartile range, FDC: follicular dendritic cell, GC: germinal center

Significant p-values are italicized and bold

Missing data: ^0-5, \$6-10, \*11-15, #16-20
